# Supplementary material for: A Nuclear Chemical Descriptor Based on NMR Databases for Molecular Information: Characterization of π-Conjugated Oligomers
Source: Research Square preprint supplement (doi:10.21203/rs.3.rs-6735069/v1), 2025-06-05
Supplement: Supplementary file 1 [file e68b0d5a071ce02e46c55a44.docx]

**Supplementary Information**

**A Nuclear Chemical Descriptor Based on NMR Databases for Molecular Information: Characterization of π-Conjugated Oligomers**

João P. C. Oliveira*,†, Murillo. H. Queiroz §, Patricio F. Provasi¶, Roberto Rivelino*‡

†*Centro de Ciência e Tecnologia em Energia e Sustentabilidade, Universidade Federal do Recôncavo da Bahia, 44085-132 Feira de Santana, Bahia, Brazil*

§ *Departamento de Físico-Química, Instituto de Química, Universidade Federal da Bahia, Rua Barão de Jeremoabo 147, 40170-115 Salvador, Bahia, Brazil*

¶ *Department of Physics, University of Northeastern, IMIT-CONICET. Av. Libertad 5500, W 3404 AAS Corrientes, Argentina*

‡ *Instituto de Física, Universidade Federal da Bahia, 40210-340 Salvador, Bahia, Brazil*

| 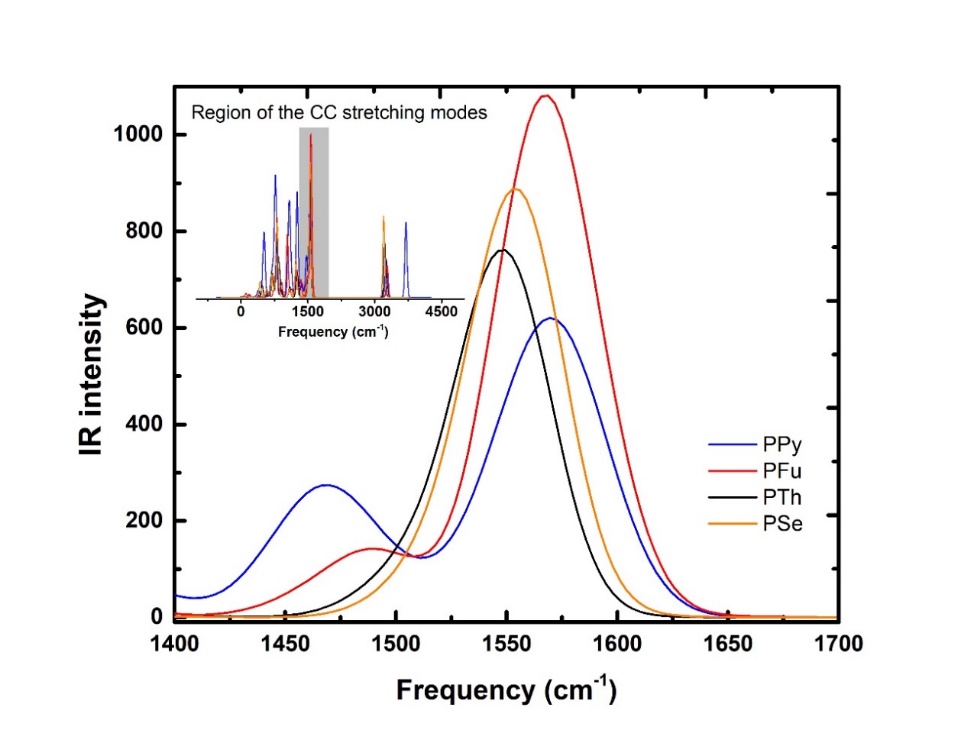 |
| --- |

**Fig S1.** PBE0/6-311+G(d,p) calculated IR spectra as a function of the heteroatom and oligomer size.

**Table S1.** Calculated JCA for oligomers as a function of n.

| n | JCA (Hz) | | | |
| --- | --- | --- | --- | --- |
| PPy | PFu | PTh | PSe |
| 2 | 5.72 | 5.42 | 3.33 | 4.30 |
| 3 | 3.34 | 1.94 | 1.73 | 2.73 |
| 5 | 1.65 | -0.68 | 0.44 | 1.65 |
| 7 | 1.02 | -1.71 | 0.00 | 1.19 |
| 9 | 0.67 | -2.25 | -0.33 | 0.91 |
| 11 | 0.43 | -2.57 | -0.52 | 0.79 |

**Table S2**. CAM-B3LYP//PBE0, 6-311+G(d,p) calculated optical gaps and absorption wavelengths as a function of n.

| n |  | | | | | | | |
| --- | --- | --- | --- | --- | --- | --- | --- | --- |
| PPy | | PFu | | PTh | | PSe | |
|  | Opt. Gap | Abs. | Opt. Gap | Abs. | Opt. Gap | Abs. | Opt. Gap | Abs. |
| 2 | 5.10 | 243.1 | 4.75 | 261.0 | 4.42 | 280.7 | 4.15 | 298.4 |
| 3 | 4.41 | 280.9 | 3.99 | 311.0 | 3.74 | 331.4 | 3.51 | 352.9 |
| 5 | 3.84 | 323.3 | 3.33 | 371.9 | 3.15 | 393.3 | 2.93 | 422.8 |
| 7 | 3.62 | 342.6 | 3.06 | 404.8 | 2.91 | 426.8 | 2.68 | 461.9 |
| 9 | 3.51 | 353.0 | 2.92 | 424.1 | 2.73 | 453.4 | 2.56 | 485.1 |
| 11 | 3.44 | 360.7 | 2.84 | 436.2 | 2.70 | 458.6 | 2.48 | 499.8 |
